# Supplementary material for: Improved air-stability and conductivity in the 75Li2S·25P2S5 solid-state electrolyte system: the role of Li7P3S11
Source: Royal Society of Chemistry journal article supplement (doi:10.1039/d3ra04706g), 2023-01-01
Supplement: d3ra04706g1.pdf [file d3ra04706g1.pdf]

## Supporting Information

### **Improved air-stability and conductivity in the $75\text{Li}_2\text{S}\cdot 25\text{P}_2\text{S}_5$ solid-state electrolyte system: the role of $\text{Li}_7\text{P}_3\text{S}_{11}$**

Chen Mi<sup>a</sup>, Simon R. Hall<sup>a\*</sup>

<sup>a</sup>School of Chemistry, Cantock's Close, University of Bristol, Bristol BS8 1TS

\*email: [simon.hall@bristol.ac.uk](mailto:simon.hall@bristol.ac.uk)

#### **This file includes:**

Supplementary Text

Tables S1 to S14

Figs S1 to S8

## Supplementary Text

### The calculation of ionic conductivity and activation energy of the samples

Ionic conductivity ( $\sigma$ ) values were calculated by Eq. (S1) using resistance values obtained from the EIS.

$$\sigma = d/RS \quad (S1)$$

where  $d$  (cm) is the thickness of solid state electrolytes,  $S$  (cm<sup>2</sup>) belongs to the effective electrolyte area, and  $R$  represents the total electrolyte resistance.

In addition, activation energies ( $Ea$ ) could be calculated using Eq. (S2),

$$\sigma = \sigma_0 \exp(-Ea/RT) \quad (S2)$$

where  $\sigma_0$  is the pre-exponential factor,  $R$  is the gas constant, and  $T$  is the absolute temperature.

### Exposure method A for pXRD

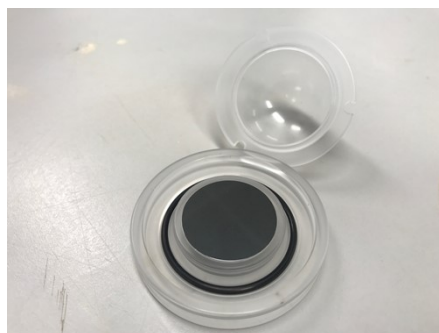

Perform pXRD experiments using the silicon bubble holder as shown in the picture to ensure that the sample is in a sealed state during the testing process. First, the sample was prepared in a glove box filled with nitrogen. This sample was called 0 min (corresponding to the mark in Fig. 10). After the test, the bubble holder lid was opened to expose the sample to the air environment, quickly placed it in the glove box chamber with a volume of approximately 30000 cm<sup>3</sup>, and quickly tightened the chamber lid (the entire process took about 10 seconds). The glove box chamber has been opened and filled with air for 1 minute in advance. After 1 minute in the air-filled chamber, the sample was transferred to the glove box and covered. This sample was named 1 min. In the same way, the sample was placed back into the glove box chamber again after testing and left for 1 minute (being exposed to air for a total of 2 minutes). This

sample was called 2 min. Following that, the sample was exposed to air for another 1 minute, 2 minutes, 2 minutes, and 3 minutes, and was given the names 3 min, 5 min, 7 min, and 10 min.

### **Exposure method B for pXRD**

In the glove box, 0.1g of sample was placed in each of the four vials with a diameter of 10 mm and a volume of 28 ml. Then, the vials were sealed and removed from the glove box. In the fume hood, the vial lids were opened and the samples were exposed to air for 1 day, 2 days, 3 days and 7 days, respectively.

### **Exposure method A for SEM**

The tested sample was always placed in the SEM chamber with a volume of 38000 cm<sup>3</sup> until the test was completed. The exposure time of the sample in the air was controlled by vacuuming and venting the SEM chamber via the SEM console. Since vacuuming and venting are both gradual processes, timing commenced when they were finally finished. The vacuuming and venting processes took about 3 minutes in total.

### **Exposure method B for SEM**

The sample preparation is the same as **Exposure method B for pXRD**.

## Supplementary Tables

Table S1.  $T_g$ ,  $T_c$  and  $T_c - T_g$  of ball-milled  $(100-x)(0.75\text{Li}_2\text{S}\cdot 0.25\text{P}_2\text{S}_5)\cdot x\text{P}_2\text{O}_5$  ( $x = 0, 1, 2, 3, 4$ ).

| Sample               | $T_g / ^\circ\text{C}$ | $T_c / ^\circ\text{C}$ | $T_c - T_g / ^\circ\text{C}$ |
|----------------------|------------------------|------------------------|------------------------------|
| x = 0 <sup>[1]</sup> | 178.4                  | 220.1                  | 41.7                         |
| x = 1                | 180.2                  | 223.1                  | 42.9                         |
| x = 2                | 181.8                  | 225.5                  | 43.7                         |
| x = 3                | 183.0                  | 227.3                  | 44.3                         |
| x = 4                | 184.5                  | 229.7                  | 45.2                         |

Table S2. Peak assignments for the 0PO <sup>[1]</sup>.

| Raman shift / $\text{cm}^{-1}$ | Assignment                                                | Ref |
|--------------------------------|-----------------------------------------------------------|-----|
| 269                            | $\delta_{\text{def}}(\text{S-P-S})$ in $\text{PS}_4^{3-}$ | [2] |
| 388                            | $\text{P}_2\text{S}_6^{4-}$                               | [3] |
| 423                            | $\nu_{\text{s}}(\text{PS}_4^{3-})$ in $\text{PS}_4^{3-}$  | [4] |
| 574                            | $\nu_{\text{as}}(\text{PS}_4^{3-})$ in $\text{PS}_4^{3-}$ | [4] |

Table S3. Peak assignments for the 1PO.

| Raman shift / $\text{cm}^{-1}$ | Assignment                                                | Ref   |
|--------------------------------|-----------------------------------------------------------|-------|
| 266                            | $\delta_{\text{def}}(\text{S-P-S})$ in $\text{PS}_4^{3-}$ | [2]   |
| 387                            | $\text{P}_2\text{S}_6^{4-}$                               | [3]   |
| 422                            | $\text{PS}_4^{3-}$ and $\text{P}_2\text{S}_7^{4-}$        | [4-5] |
| 573                            | $\nu_{\text{as}}(\text{PS}_4^{3-})$ in $\text{PS}_4^{3-}$ | [4]   |

Table S4. Peak assignments for the 2PO.

| Raman shift / $\text{cm}^{-1}$ | Assignment                                                | Ref   |
|--------------------------------|-----------------------------------------------------------|-------|
| 266                            | $\delta_{\text{def}}(\text{S-P-S})$ in $\text{PS}_4^{3-}$ | [2]   |
| 387                            | $\text{P}_2\text{S}_6^{4-}$                               | [3]   |
| 417                            | $\text{PS}_4^{3-}$ and $\text{P}_2\text{S}_7^{4-}$        | [4-5] |
| 573                            | $\nu_{\text{as}}(\text{PS}_4^{3-})$ in $\text{PS}_4^{3-}$ | [4]   |

Table S5. Peak assignments for the 3PO.

| Raman shift / $\text{cm}^{-1}$ | Assignment                                                | Ref   |
|--------------------------------|-----------------------------------------------------------|-------|
| 266                            | $\delta_{\text{def}}(\text{S-P-S})$ in $\text{PS}_4^{3-}$ | [2]   |
| 385                            | $\text{P}_2\text{S}_6^{4-}$                               | [3]   |
| 419                            | $\text{PS}_4^{3-}$ and $\text{P}_2\text{S}_7^{4-}$        | [4-5] |
| 573                            | $\nu_{\text{as}}(\text{PS}_4^{3-})$ in $\text{PS}_4^{3-}$ | [4]   |

Table S6. Peak assignments for the 4PO.

| Raman shift / $\text{cm}^{-1}$ | Assignment                                                | Ref   |
|--------------------------------|-----------------------------------------------------------|-------|
| 221                            | S-S-S bending in $\text{S}_8$                             | [2]   |
| 266                            | $\delta_{\text{def}}(\text{S-P-S})$ in $\text{PS}_4^{3-}$ | [2]   |
| 387                            | $\text{P}_2\text{S}_6^{4-}$                               | [3]   |
| 419                            | $\text{PS}_4^{3-}$ and $\text{P}_2\text{S}_7^{4-}$        | [4-5] |
| 471                            | S-S bending in $\text{S}_8$                               | [3]   |
| 573                            | $\nu_{\text{as}}(\text{PS}_4^{3-})$ in $\text{PS}_4^{3-}$ | [4]   |

Table S7. The fitting parameters of deconvoluted Raman spectra of 1PO. FWHM is an abbreviation for full width of the peak at half maximum value.

| Assigned unit               | Peak center / $\text{cm}^{-1}$ | FWHM / $\text{cm}^{-1}$ | Area / a.u. |
|-----------------------------|--------------------------------|-------------------------|-------------|
| $\text{P}_2\text{S}_6^{4-}$ | 387                            | 8.6                     | 743235      |
| $\text{P}_2\text{S}_7^{4-}$ | 419                            | 6.7                     | 43343       |
| $\text{PS}_4^{3-}$          | 423                            | 5.3                     | 191323      |

Table S8. The fitting parameters of deconvoluted Raman spectra of 2PO.

| Assigned unit               | Peak center / $\text{cm}^{-1}$ | FWHM / $\text{cm}^{-1}$ | Area / a.u. |
|-----------------------------|--------------------------------|-------------------------|-------------|
| $\text{P}_2\text{S}_6^{4-}$ | 387                            | 8.0                     | 609276      |
| $\text{P}_2\text{S}_7^{4-}$ | 416                            | 4.6                     | 49615       |
| $\text{PS}_4^{3-}$          | 418                            | 5.1                     | 110409      |

Table S9. The fitting parameters of deconvoluted  $^{31}\text{P}$  MAS NMR of 0PO. (G)PS $_4^{3-}$ , (C)PS $_4^{3-}$ , P $_2$ S $_6^{4-}$  are the abbreviations for PS $_4^{3-}$  (glass), PS $_4^{3-}$  (crystal) and P $_2$ S $_6^{4-}$  (glass + crystal), respectively.

| Assigned unit      | Peak center / ppm | FWHM / ppm | Area / a.u. |
|--------------------|-------------------|------------|-------------|
| (G)PS $_4^{3-}$    | 87.9              | 7.1        | 1.4         |
| (C)PS $_4^{3-}$    | 86.6              | 0.8        | 1.2         |
| P $_2$ S $_6^{4-}$ | 106.0             | 7.7        | 5.1         |

Table S10. The fitting parameters of deconvoluted  $^{31}\text{P}$  MAS NMR of 1PO. P $_2$ S $_7^{4-}$  is the abbreviations for P $_2$ S $_7^{4-}$  (crystal).

| Assigned unit      | Peak center / ppm | FWHM / ppm | Area / a.u. |
|--------------------|-------------------|------------|-------------|
| (G)PS $_4^{3-}$    | 86.6              | 15.5       | 1.3         |
| (C)PS $_4^{3-}$    | 86.7              | 0.8        | 1.2         |
| P $_2$ S $_7^{4-}$ | 88.8              | 4.2        | 1.6         |
| P $_2$ S $_6^{4-}$ | 105.9             | 7.7        | 2.4         |

Table S11. The fitting parameters of deconvoluted  $^{31}\text{P}$  MAS NMR of 2PO.

| Assigned unit      | Peak center / ppm | FWHM / ppm | Area / a.u. |
|--------------------|-------------------|------------|-------------|
| (G)PS $_4^{3-}$    | 86.7              | 7.8        | 3.0         |
| (C)PS $_4^{3-}$    | 86.7              | 0.6        | 0.7         |
| P $_2$ S $_7^{4-}$ | 90.8              | 5.8        | 2.5         |
| P $_2$ S $_6^{4-}$ | 105.6             | 6.5        | 0.7         |

Table S12. The fitting parameters of deconvoluted  $^{31}\text{P}$  MAS NMR of 3PO.

| Assigned unit      | Peak center / ppm | FWHM / ppm | Area / a.u. |
|--------------------|-------------------|------------|-------------|
| (G)PS $_4^{3-}$    | 86.6              | 13.7       | 0.8         |
| (C)PS $_4^{3-}$    | 86.6              | 1.0        | 1.6         |
| P $_2$ S $_7^{4-}$ | 89.6              | 2.7        | 0.3         |
| P $_2$ S $_6^{4-}$ | 106.1             | 7.9        | 1.9         |

Table S13. The fitting parameters of deconvoluted  $^{31}\text{P}$  MAS NMR of 4PO.

| Assigned unit      | Peak center / ppm | FWHM / ppm | Area / a.u. |
|--------------------|-------------------|------------|-------------|
| (C)PS $_4^{3-}$    | 86.6              | 1.1        | 1.7         |
| P $_2$ S $_7^{4-}$ | 89.7              | 2.8        | 0.4         |
| P $_2$ S $_6^{4-}$ | 105.9             | 7.4        | 4.2         |

Table S14. The ionic conductivity of 2PO at various temperatures.

| Temperatur<br>e / °C | Thickness<br>/ cm | Area<br>/ cm $^2$ | Resistance<br>/ $\Omega$ | Ionic conductivity<br>/ S cm $^{-1}$ |
|----------------------|-------------------|-------------------|--------------------------|--------------------------------------|
| 25                   | 0.1               | 0.785             | 2032                     | $6.3 \times 10^{-5}$                 |
| 70                   | 0.1               | 0.785             | 735                      | $1.7 \times 10^{-4}$                 |
| 80                   | 0.1               | 0.785             | 612                      | $2.1 \times 10^{-4}$                 |
| 90                   | 0.1               | 0.785             | 509                      | $2.5 \times 10^{-4}$                 |
| 100                  | 0.1               | 0.785             | 406                      | $3.1 \times 10^{-4}$                 |
| 110                  | 0.1               | 0.785             | 331                      | $3.8 \times 10^{-4}$                 |
| 120                  | 0.1               | 0.785             | 280                      | $4.5 \times 10^{-4}$                 |

## Supplementary Figures

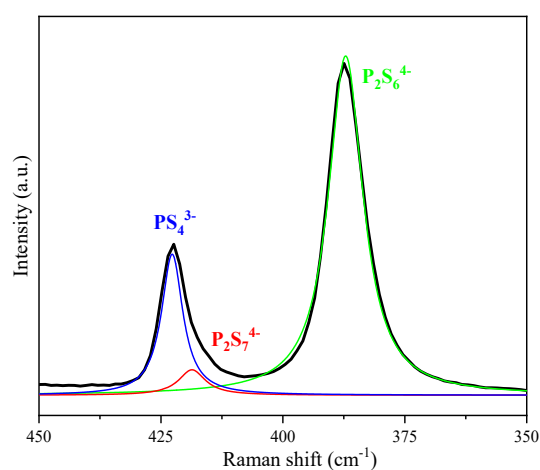

Fig. S1. Deconvoluted Raman spectra of 1PO. The black line represents the experimental data. The blue, green and red lines are the deconvoluted signals attributed to  $\text{PS}_4^{3-}$ ,  $\text{P}_2\text{S}_6^{4-}$  and  $\text{P}_2\text{S}_7^{4-}$  moieties, respectively.

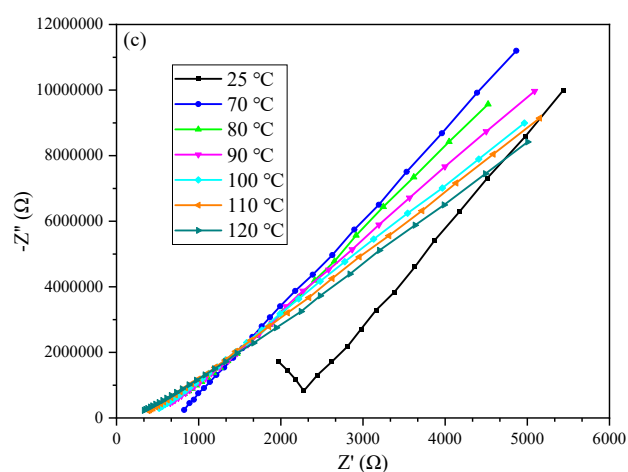

Fig. S2. The Nyquist plot of electrochemical impedance for the 2PO at various temperatures.



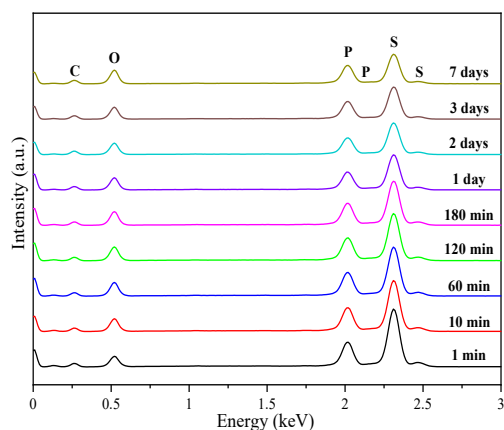

Fig. S3. EDS spectra of 2PO exposed at various times.

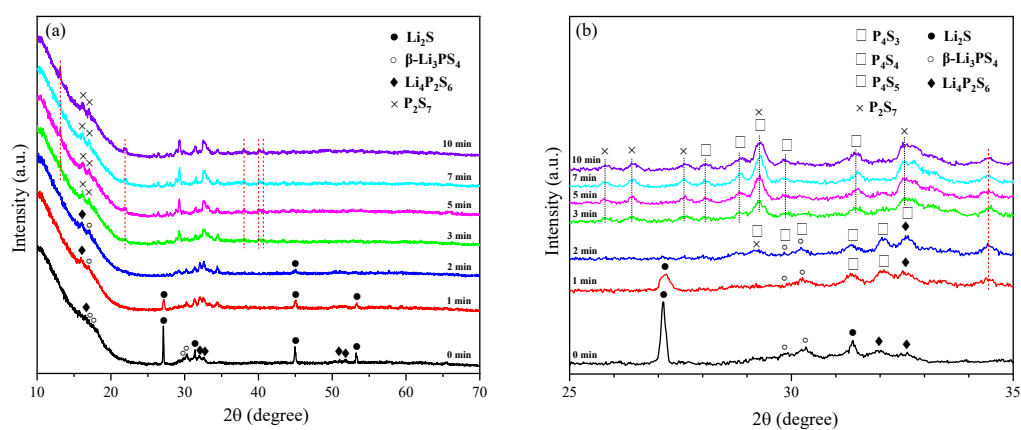

Fig. S4. (a) pXRD patterns of 0PO exposed to air for 1 min, 2 min, 3 min, 5 min, 7 min and 10 min. (b) is an enlarged view of (a) in the  $2\theta$  of  $25^\circ$  to  $35^\circ$  range.

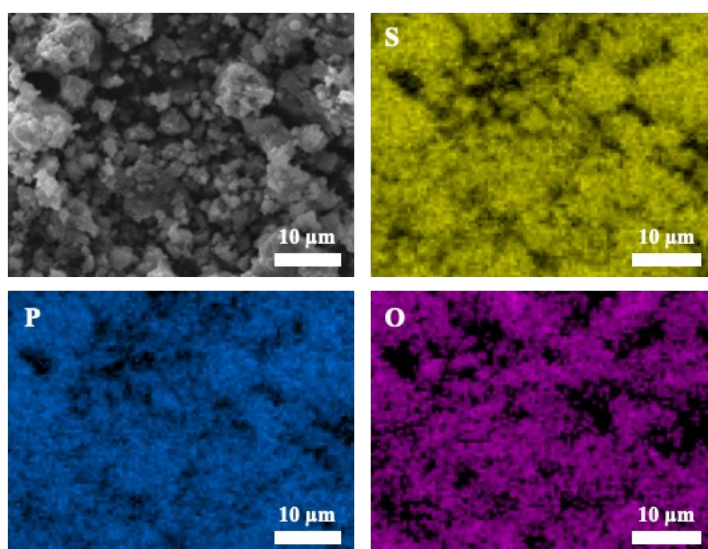

Fig. S5. EDS elemental mapping of 2PO within a chosen area.

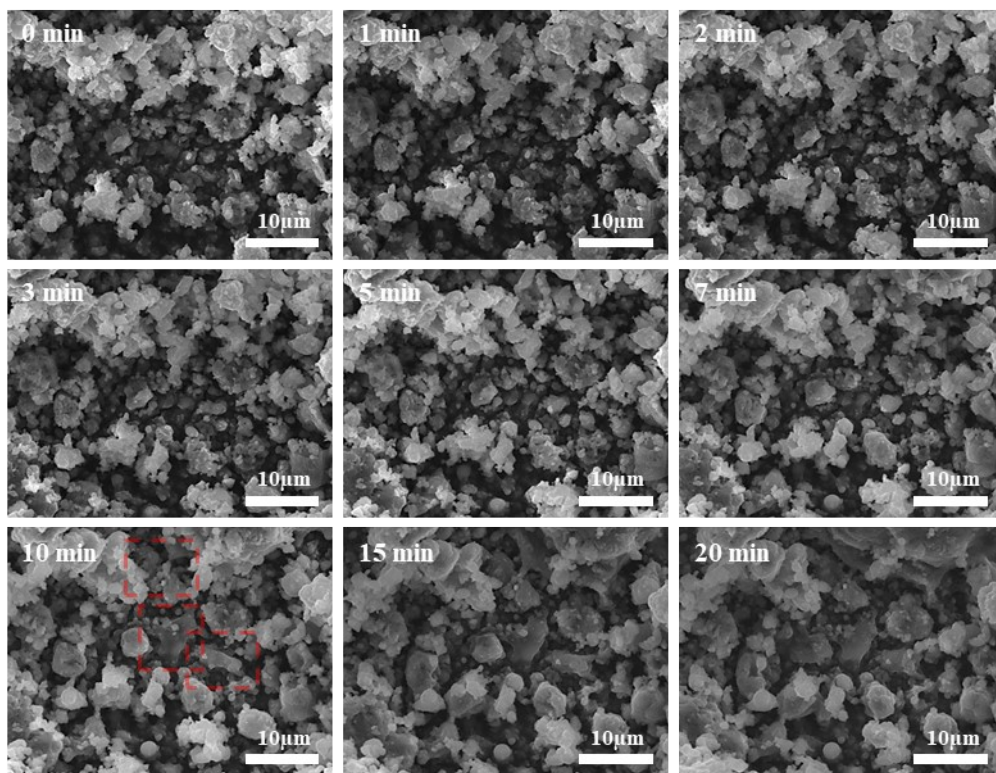

Fig. S6. Typical SEM images of 2PO at various exposure times using exposure method A.

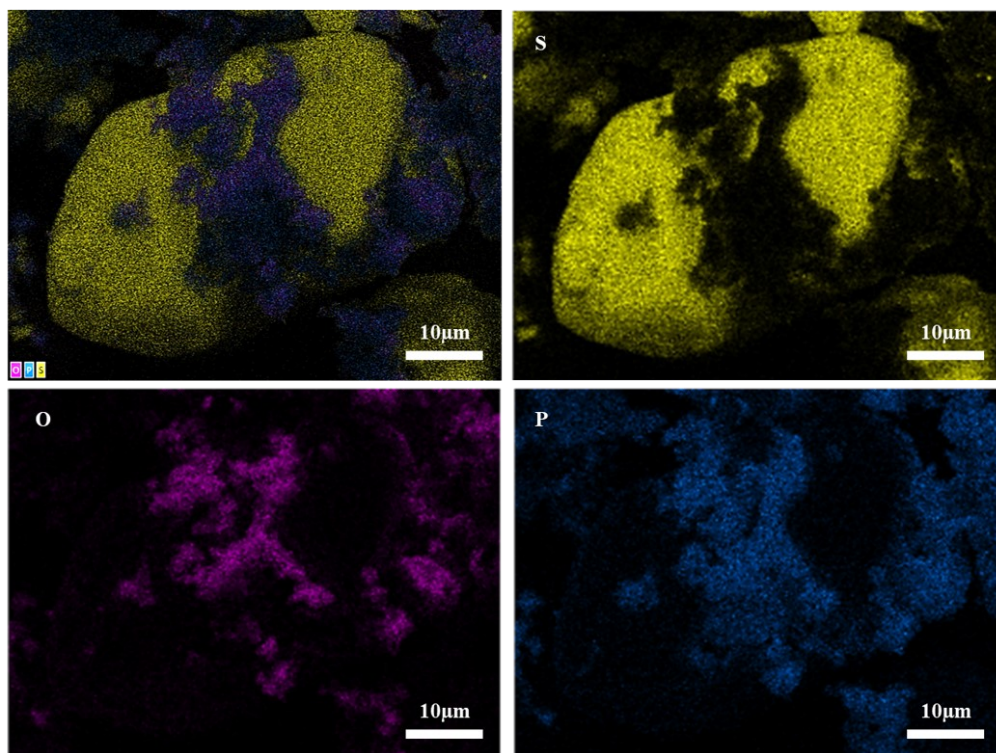

Fig. S7. EDS elemental mapping of 2PO exposed to air for 2 days.

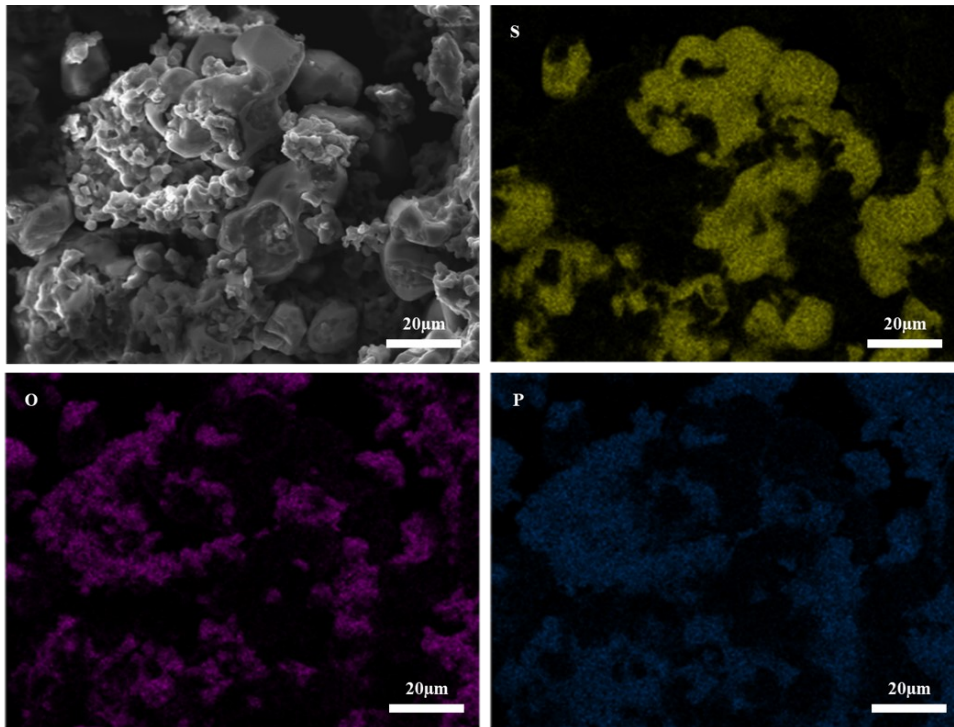

Fig. S8. SEM and EDS images of 2PO exposed to air for 7 days.

## References

- [1] C. Mi and S. R. Hall, *Solid State Ionics* **2023**, *389*, 116106.
- [2] Y. Zhou, C. Doerrler, J. Kasemchainan, P. G. Bruce, M. Pasta and L. J. Hardwick, *Batteries & Supercaps* **2020**, *3*, 647-652.
- [3] Z. Quan, M. Hirayama, D. Sato, Y. Zheng, T. a. Yano, K. Hara, K. Suzuki, M. Hara and R. Kanno, *Journal of the American Ceramic Society* **2017**, *100*, 746-753.
- [4] L. Sang, R. T. Haasch, A. A. Gewirth and R. G. Nuzzo, *Chemistry of Materials* **2017**, *29*, 3029-3037.
- [5] Ö. U. Kudu, T. Famprakis, S. Cretu, B. Porcheron, E. Salager, A. Demortiere, M. Courty, V. Viallet, T. Le Mercier and B. Fleutot, *Energy Storage Materials* **2022**, *44*, 168-179.
